# Supplementary material
Source: PubMed Central journal article supplement (PMC4217535)
Supplement: NIHMS553204-supplement-Supplementary_Tables.pdf [file NIHMS553204-supplement-Supplementary_Tables.pdf]

Supplementary Tables for “Using Data Augmentation to Facilitate  
Conduct of Phase I/II Clinical Trials with Delayed Outcomes”

Ick Hoon Jin, Suyu Liu, Peter F. Thall and Ying Yuan

October 23, 2013

Table S1: Additional simulation results for comparing five phase I-II designs in Case 2 under Scenarios 5 and 7. The probability pairs given in parentheses for each dose level are  $(\pi_E(d_r)^{true}, \pi_T(d_r)^{true})$ .

| Method        |                 | Dose Level   |              |              |              |              | None   | $N_E/N_T$ | Duration<br>(Days) |
|---------------|-----------------|--------------|--------------|--------------|--------------|--------------|--------|-----------|--------------------|
|               |                 | 1            | 2            | 3            | 4            | 5            |        |           |                    |
|               | Scenario 5      | (0.20, 0.10) | (0.50, 0.19) | (0.52, 0.23) | (0.54, 0.44) | (0.56, 0.54) |        |           |                    |
|               | $\delta^{true}$ | 0.55         | 0.69         | 0.66         | 0.45         | 0.38         |        |           |                    |
| LO-EffTox     | % selected      | 13.0         | 48.7         | 32.7         | 5.0          | 0.4          | 0.2    | 21.6/10.4 | 246                |
|               | # patients      | 9.75         | 17.11        | 14.75        | 4.93         | 1.37         |        |           |                    |
| One Down      | % selected      | 8.2          | 13.3         | 77.9         | 0.6          | 0.0          | 0.0    | 12.5/5.6  | 246                |
|               | # patients      | 38.75        | 9.22         | 0.03         | 0.00         | 0.00         |        |           |                    |
| Look Ahead    | % selected      | 10.1         | 37.3         | 46.6         | 5.1          | 0.8          | 0.1    | 22.4/10.9 | 394                |
|               | # patients      | 7.22         | 15.53        | 18.87        | 5.46         | 0.90         | (46.2) |           |                    |
| Complete Case | % selected      | 19.4         | 30.2         | 35.6         | 12.4         | 2.4          | 0.0    | 14.5/7.3  | 246                |
|               | # patients      | 32.06        | 6.48         | 5.96         | 2.87         | 0.62         |        |           |                    |
| TiTE-CRM      | % selected      | 0.1          | 3.2          | 38.5         | 51.6         | 5.7          | 0.9    | 23.9/16.3 | 239                |
|               | # patients      | 4.33         | 5.64         | 12.33        | 16.82        | 8.51         |        |           |                    |
|               | Scenario 7      | (0.02, 0.10) | (0.05, 0.25) | (0.30, 0.30) | (0.40, 0.55) | (0.50, 0.70) |        |           |                    |
|               | $\delta$        | 0.43         | 0.34         | 0.42         | 0.31         | 0.27         |        |           |                    |
| LO-EffTox     | % selected      | 0.0          | 3.6          | 60.8         | 6.4          | 1.0          | 28.2   | 11.3/14.7 | 205                |
|               | # patients      | 3.25         | 6.58         | 22.17        | 6.55         | 3.78         |        |           |                    |
| One Down      | % selected      | 15.3         | 7.7          | 75.5         | 0.3          | 0.0          | 1.2    | 9.5/9.9   | 246                |
|               | # patients      | 38.87        | 8.98         | 0.01         | 0.00         | 0.00         |        |           |                    |
| Look Ahead    | % selected      | 7.0          | 8.3          | 23.0         | 47.9         | 12.8         | 1.0    | 25.8/14.9 | 442                |
|               | # patients      | 7.88         | 6.89         | 10.79        | 15.93        | 6.15         | (60.8) |           |                    |
| Complete Case | % selected      | 27.8         | 40.2         | 22.8         | 7.1          | 2.0          | 0.1    | 14.4/7.6  | 246                |
|               | # patients      | 32.84        | 7.63         | 5.38         | 1.82         | 0.33         |        |           |                    |
| TiTE-CRM      | % selected      | 1.5          | 18.5         | 59.2         | 18.7         | 0.1          | 2.0    | 12.2/17.5 | 236                |
|               | # patients      | 5.20         | 9.38         | 17.95        | 11.26        | 3.38         |        |           |                    |

Table S2: Sensitivity analysis of the LO-EffTox design under different degrees of late-onset events, i.e.,  $\pi_{j,late}(d)^{true} = \Pr(U_j/2 \leq X_j \leq U_j | d)^{true}$ , in Case 1. The probability pairs given in parentheses for each dose level are  $(\pi_E(d_r)^{true}, \pi_T(d_r)^{true})$ .

| $\pi_{j,late}(d)^{true}$ |                 | Dose Level   |              |              |              |              | None | $N_E/N_T$ | Duration<br>(Weeks) |
|--------------------------|-----------------|--------------|--------------|--------------|--------------|--------------|------|-----------|---------------------|
|                          |                 | 1            | 2            | 3            | 4            | 5            |      |           |                     |
| Scenario 1               |                 | (0.05, 0.03) | (0.10, 0.05) | (0.20, 0.07) | (0.25, 0.08) | (0.35, 0.10) |      |           |                     |
|                          | $\delta^{true}$ | 0.52         | 0.53         | 0.58         | 0.61         | 0.67         |      |           |                     |
| 10%                      | % selected      | 0.0          | 0.3          | 3.3          | 4.5          | 90.2         | 1.7  | 11.5/3.7  | 37.2                |
|                          | # patients      | 6.11         | 6.78         | 7.55         | 5.31         | 22.02        |      |           |                     |
| 30%                      | % selected      | 0.1          | 0.3          | 2.1          | 2.7          | 92.0         | 2.8  | 11.6/3.7  | 36.9                |
|                          | # patients      | 6.16         | 6.74         | 7.05         | 5.25         | 22.44        |      |           |                     |
| 70%                      | % selected      | 0.0          | 0.2          | 1.8          | 2.5          | 91.6         | 3.9  | 11.6/3.7  | 36.9                |
|                          | # patients      | 6.09         | 6.59         | 6.89         | 4.90         | 22.96        |      |           |                     |
| 90%                      | % selected      | 0.1          | 0.2          | 2.1          | 2.9          | 89.8         | 4.9  | 11.5/3.7  | 36.7                |
|                          | # patients      | 6.06         | 6.59         | 7.34         | 5.08         | 22.25        |      |           |                     |
| Scenario 2               |                 | (0.02, 0.10) | (0.10, 0.15) | (0.40, 0.20) | (0.45, 0.30) | (0.50, 0.60) |      |           |                     |
|                          | $\delta^{true}$ | 0.43         | 0.43         | 0.59         | 0.52         | 0.32         |      |           |                     |
| 10%                      | % selected      | 0.0          | 9.9          | 55.0         | 25.7         | 8.4          | 1.0  | 15.4/12.5 | 37.2                |
|                          | # patients      | 6.09         | 8.96         | 15.05        | 10.13        | 7.48         |      |           |                     |
| 30%                      | % selected      | 0.1          | 9.7          | 57.9         | 23.5         | 8.0          | 0.8  | 15.6/12.9 | 37.3                |
|                          | # patients      | 6.03         | 8.57         | 14.27        | 10.57        | 8.37         |      |           |                     |
| 70%                      | % selected      | 0.0          | 12.4         | 65.0         | 17.4         | 4.6          | 0.6  | 15.4/13.2 | 37.3                |
|                          | # patients      | 6.05         | 9.46         | 13.75        | 8.76         | 9.79         |      |           |                     |
| 90%                      | % selected      | 0.0          | 16.3         | 64.7         | 15.1         | 2.9          | 1.0  | 15.4/13.5 | 37.4                |
|                          | # patients      | 6.07         | 9.41         | 13.54        | 8.03         | 10.72        |      |           |                     |
| Scenario 3               |                 | (0.30, 0.10) | (0.35, 0.20) | (0.45, 0.40) | (0.50, 0.60) | (0.55, 0.65) |      |           |                     |
|                          | $\delta^{true}$ | 0.63         | 0.55         | 0.43         | 0.32         | 0.31         |      |           |                     |
| 10%                      | % selected      | 71.1         | 24.1         | 3.6          | 0.8          | 0.0          | 0.4  | 16.0/8.1  | 37.4                |
|                          | # patients      | 28.13        | 14.16        | 4.39         | 1.00         | 0.15         |      |           |                     |
| 30%                      | % selected      | 72.3         | 23.0         | 3.3          | 0.6          | 0.0          | 0.8  | 16.1/8.6  | 37.3                |
|                          | # patients      | 26.58        | 14.09        | 5.14         | 1.55         | 0.36         |      |           |                     |
| 70%                      | % selected      | 74.7         | 22.0         | 2.9          | 0.1          | 0.0          | 0.3  | 16.4/9.3  | 37.1                |
|                          | # patients      | 25.79        | 13.52        | 5.58         | 2.14         | 0.88         |      |           |                     |
| 90%                      | % selected      | 78.6         | 19.5         | 1.6          | 0.2          | 0.0          | 0.1  | 16.3/9.0  | 36.0                |
|                          | # patients      | 27.60        | 12.51        | 4.90         | 2.11         | 0.84         |      |           |                     |

| $\pi_{j,late}(d)^{true}$ |                 | Dose Level   |              |              |              |              |      | $N_E/N_T$ | Duration<br>(Weeks) |
|--------------------------|-----------------|--------------|--------------|--------------|--------------|--------------|------|-----------|---------------------|
|                          |                 | 1            | 2            | 3            | 4            | 5            | None |           |                     |
|                          | Scenario 4      | (0.18, 0.20) | (0.28, 0.24) | (0.55, 0.28) | (0.74, 0.31) | (0.79, 0.33) |      |           |                     |
|                          | $\delta^{true}$ | 0.44         | 0.46         | 0.62         | 0.76         | 0.78         |      |           |                     |
| 10%                      | % selected      | 4.6          | 4.0          | 8.1          | 17.9         | 62.1         | 3.3  | 24.9/12.8 | 36.4                |
|                          | # patients      | 9.90         | 7.15         | 8.06         | 9.81         | 11.90        |      |           |                     |
| 30%                      | % selected      | 3.7          | 3.3          | 8.4          | 20.2         | 61.6         | 2.8  | 24.9/12.9 | 36.6                |
|                          | # patients      | 10.07        | 7.02         | 7.99         | 10.18        | 11.72        |      |           |                     |
| 70%                      | % selected      | 1.9          | 2.5          | 6.6          | 20.0         | 67.2         | 1.8  | 25.8/13.1 | 36.9                |
|                          | # patients      | 9.45         | 6.87         | 7.75         | 9.49         | 13.79        |      |           |                     |
| 90%                      | % selected      | 2.2          | 2.5          | 8.4          | 15.2         | 71.1         | 0.6  | 26.2/13.4 | 37.3                |
|                          | # patients      | 9.17         | 7.12         | 7.55         | 8.96         | 14.98        |      |           |                     |
|                          | Scenario 5      | (0.20, 0.10) | (0.50, 0.19) | (0.52, 0.23) | (0.54, 0.44) | (0.56, 0.54) |      |           |                     |
|                          | $\delta^{true}$ | 0.55         | 0.69         | 0.66         | 0.45         | 0.38         |      |           |                     |
| 10%                      | % selected      | 13.0         | 41.6         | 33.7         | 10.5         | 0.8          | 0.4  | 20.5/ 9.4 | 37.2                |
|                          | # patients      | 12.88        | 17.94        | 13.45        | 3.18         | 0.40         |      |           |                     |
| 30%                      | % selected      | 12.0         | 44.1         | 35.9         | 6.6          | 1.1          | 0.3  | 21.0/10.0 | 37.4                |
|                          | # patients      | 11.12        | 16.58        | 14.97        | 4.26         | 0.96         |      |           |                     |
| 70%                      | % selected      | 14.4         | 51.4         | 28.7         | 5.2          | 0.3          | 0.0  | 21.1/10.5 | 37.5                |
|                          | # patients      | 11.30        | 16.33        | 13.80        | 4.86         | 1.70         |      |           |                     |
| 90%                      | % selected      | 15.5         | 52.4         | 27.7         | 3.8          | 0.4          | 0.2  | 21.3/10.9 | 37.2                |
|                          | # patients      | 10.77        | 16.26        | 13.21        | 5.39         | 2.31         |      |           |                     |
|                          | Scenario 6      | (0.20, 0.10) | (0.50, 0.19) | (0.52, 0.34) | (0.54, 0.44) | (0.56, 0.54) |      |           |                     |
|                          | $\delta^{true}$ | 0.55         | 0.69         | 0.53         | 0.45         | 0.38         |      |           |                     |
| 10%                      | % selected      | 19.9         | 55.8         | 19.9         | 3.5          | 0.5          | 0.4  | 19.9/ 9.8 | 37.3                |
|                          | # patients      | 14.74        | 21.46        | 9.60         | 1.79         | 0.27         |      |           |                     |
| 30%                      | % selected      | 21.1         | 58.5         | 16.2         | 3.1          | 0.8          | 0.3  | 20.4/10.5 | 37.4                |
|                          | # patients      | 13.63        | 20.44        | 10.62        | 2.57         | 0.61         |      |           |                     |
| 70%                      | % selected      | 20.3         | 62.2         | 13.9         | 2.9          | 0.6          | 0.1  | 20.6/11.0 | 37.5                |
|                          | # patients      | 13.36        | 18.84        | 10.90        | 3.65         | 1.21         |      |           |                     |
| 90%                      | % selected      | 24.0         | 60.2         | 13.9         | 1.4          | 0.4          | 0.1  | 20.3/11.0 | 37.2                |
|                          | # patients      | 13.68        | 17.89        | 10.60        | 4.09         | 1.70         |      |           |                     |

| $\pi_{j,late}(d)^{true}$ |                 | Dose Level   |              |              |              |              |      | $N_E/N_T$ | Duration<br>(Weeks) |
|--------------------------|-----------------|--------------|--------------|--------------|--------------|--------------|------|-----------|---------------------|
|                          |                 | 1            | 2            | 3            | 4            | 5            | None |           |                     |
| Scenario 7               |                 | (0.02, 0.10) | (0.05, 0.25) | (0.30, 0.30) | (0.40, 0.55) | (0.50, 0.70) |      |           |                     |
|                          | $\delta^{true}$ | 0.43         | 0.34         | 0.42         | 0.31         | 0.27         |      |           |                     |
| 10%                      | % selected      | 0.0          | 3.7          | 65.6         | 8.0          | 1.2          | 21.5 | 10.8/14.8 | 33.7                |
|                          | # patients      | 6.53         | 9.00         | 18.23        | 6.70         | 3.93         |      |           |                     |
| 30%                      | % selected      | 0.0          | 3.4          | 58.9         | 8.6          | 1.4          | 27.7 | 10.5/14.9 | 33.2                |
|                          | # patients      | 6.44         | 9.53         | 16.80        | 6.34         | 4.77         |      |           |                     |
| 70%                      | % selected      | 0.0          | 4.3          | 61.9         | 8.0          | 1.5          | 24.3 | 11.5/15.9 | 34.0                |
|                          | # patients      | 6.07         | 9.19         | 16.92        | 6.02         | 6.56         |      |           |                     |
| 90%                      | % selected      | 0.0          | 4.8          | 59.4         | 7.5          | 1.6          | 26.7 | 11.6/16.3 | 33.5                |
|                          | # patients      | 5.83         | 8.83         | 16.37        | 6.46         | 7.09         |      |           |                     |
| Scenario 8               |                 | (0.02, 0.10) | (0.05, 0.25) | (0.35, 0.55) | (0.40, 0.60) | (0.50, 0.70) |      |           |                     |
|                          | $\delta^{true}$ | 0.43         | 0.34         | 0.29         | 0.28         | 0.27         |      |           |                     |
| 10%                      | % selected      | 0.0          | 0.9          | 18.6         | 0.4          | 0.1          | 80.0 | 7.6/13.9  | 25.6                |
|                          | # patients      | 6.50         | 10.80        | 13.03        | 3.76         | 1.78         |      |           |                     |
| 30%                      | % selected      | 0.0          | 1.5          | 17.4         | 0.7          | 0.4          | 80.0 | 8.5/15.0  | 26.5                |
|                          | # patients      | 6.09         | 9.72         | 13.78        | 4.24         | 2.87         |      |           |                     |
| 70%                      | % selected      | 0.0          | 1.3          | 14.8         | 0.6          | 0.4          | 82.9 | 7.6/14.0  | 24.8                |
|                          | # patients      | 6.41         | 10.30        | 12.90        | 3.77         | 1.92         |      |           |                     |
| 90%                      | % selected      | 0.0          | 2.4          | 16.4         | 1.0          | 0.0          | 80.2 | 8.8/15.5  | 26.6                |
|                          | # patients      | 5.87         | 9.80         | 13.71        | 4.54         | 3.05         |      |           |                     |

Table S 3: Sensitivity analysis of the LO-EffTox design under different values of the logistical difficulty index (LDI) in Case 1. The probability pairs given in parentheses for each dose level are  $(\pi_E(d_r)^{true}, \pi_T(d_r)^{true})$ .

| LDI  |                 | Dose Level   |              |              |              |              | None | $N_E/N_T$ | Duration<br>(Weeks) |
|------|-----------------|--------------|--------------|--------------|--------------|--------------|------|-----------|---------------------|
|      |                 | 1            | 2            | 3            | 4            | 5            |      |           |                     |
|      | Scenario 1      | (0.05, 0.03) | (0.10, 0.05) | (0.20, 0.07) | (0.25, 0.08) | (0.35, 0.10) |      |           |                     |
|      | $\delta^{true}$ | 0.52         | 0.53         | 0.58         | 0.61         | 0.67         |      |           |                     |
| 3.0  | % selected      | 0.0          | 0.3          | 2.5          | 2.5          | 90.5         | 4.2  | 12.8/4.0  | 97.8                |
|      | # patients      | 4.16         | 4.83         | 5.56         | 4.62         | 27.86        |      |           |                     |
| 4.5  | % selected      | 0.0          | 0.4          | 2.8          | 2.1          | 90.9         | 3.8  | 12.2/3.7  | 67.6                |
|      | # patients      | 4.88         | 5.57         | 6.01         | 4.72         | 26.13        |      |           |                     |
| 6.0  | % selected      | 0.0          | 0.1          | 2.1          | 2.5          | 91.9         | 3.4  | 12.3/3.9  | 52.4                |
|      | # patients      | 5.25         | 5.88         | 6.11         | 4.78         | 25.36        |      |           |                     |
| 12.0 | % selected      | 0.0          | 0.6          | 2.1          | 2.7          | 91.3         | 3.3  | 11.1/3.5  | 29.2                |
|      | # patients      | 6.74         | 7.43         | 7.61         | 5.29         | 20.57        |      |           |                     |
| 18.0 | % selected      | 0.0          | 0.5          | 1.7          | 3.4          | 90.9         | 3.5  | 10.2/3.5  | 21.3                |
|      | # patients      | 8.07         | 8.50         | 8.25         | 5.76         | 17.16        |      |           |                     |
| 24.0 | % selected      | 0.0          | 0.5          | 1.6          | 2.9          | 92.2         | 2.8  | 9.8/3.2   | 17.6                |
|      | # patients      | 9.47         | 9.15         | 8.56         | 5.75         | 14.84        |      |           |                     |
|      | Scenario 2      | (0.02, 0.10) | (0.10, 0.15) | (0.40, 0.20) | (0.45, 0.30) | (0.50, 0.60) |      |           |                     |
|      | $\delta^{true}$ | 0.43         | 0.43         | 0.59         | 0.52         | 0.32         |      |           |                     |
| 3.0  | % selected      | 0.0          | 8.4          | 65.6         | 21.5         | 3.4          | 1.1  | 16.1/12.6 | 98.3                |
|      | # patients      | 4.16         | 8.38         | 17.23        | 10.27        | 7.64         |      |           |                     |
| 4.5  | % selected      | 0.0          | 11.0         | 62.0         | 23.0         | 3.3          | 0.7  | 16.0/12.7 | 68.2                |
|      | # patients      | 4.82         | 8.75         | 16.15        | 10.05        | 7.96         |      |           |                     |
| 6.0  | % selected      | 0.0          | 11.3         | 63.3         | 19.1         | 5.5          | 0.8  | 15.6/12.9 | 52.8                |
|      | # patients      | 5.24         | 9.39         | 15.04        | 9.53         | 8.57         |      |           |                     |
| 12.0 | % selected      | 0.1          | 13.5         | 61.2         | 18.3         | 6.6          | 0.3  | 15.1/13.2 | 29.4                |
|      | # patients      | 6.65         | 9.43         | 12.86        | 9.26         | 9.70         |      |           |                     |
| 18.0 | % selected      | 0.0          | 12.8         | 53.2         | 23.1         | 9.8          | 1.1  | 14.7/13.2 | 21.6                |
|      | # patients      | 8.24         | 9.21         | 11.05        | 9.11         | 10.25        |      |           |                     |
| 24.0 | % selected      | 0.1          | 10.9         | 50.6         | 22.7         | 14.4         | 1.3  | 14.0/12.9 | 17.6                |
|      | # patients      | 9.57         | 9.74         | 10.02        | 8.87         | 9.52         |      |           |                     |

| LDI  |                 | Dose Level   |              |              |              |              | None | $N_E/N_T$ | Duration<br>(Weeks) |
|------|-----------------|--------------|--------------|--------------|--------------|--------------|------|-----------|---------------------|
|      |                 | 1            | 2            | 3            | 4            | 5            |      |           |                     |
|      | Scenario 3      | (0.30, 0.10) | (0.35, 0.20) | (0.45, 0.40) | (0.50, 0.60) | (0.55, 0.65) |      |           |                     |
|      | $\delta^{true}$ | 0.63         | 0.55         | 0.43         | 0.32         | 0.31         |      |           |                     |
| 3.0  | % selected      | 71.4         | 25.9         | 2.1          | 0.3          | 0.0          | 0.3  | 16.4/8.7  | 100.1               |
|      | # patients      | 26.88        | 14.01        | 5.12         | 1.61         | 0.32         |      |           |                     |
| 4.5  | % selected      | 70.5         | 26.1         | 2.7          | 0.4          | 0.0          | 0.3  | 16.2/8.7  | 68.7                |
|      | # patients      | 26.39        | 14.23        | 5.20         | 1.70         | 0.40         |      |           |                     |
| 6.0  | % selected      | 75.3         | 22.3         | 2.0          | 0.3          | 0.0          | 0.1  | 16.0/8.7  | 53.0                |
|      | # patients      | 27.03        | 13.70        | 5.09         | 1.67         | 0.48         |      |           |                     |
| 12.0 | % selected      | 77.9         | 18.6         | 2.0          | 0.6          | 0.0          | 0.9  | 16.3/8.9  | 29.1                |
|      | # patients      | 26.81        | 13.15        | 5.30         | 1.84         | 0.57         |      |           |                     |
| 18.0 | % selected      | 78.4         | 17.6         | 2.9          | 0.3          | 0.0          | 0.8  | 16.3/9.2  | 21.6                |
|      | # patients      | 26.12        | 13.33        | 5.62         | 2.07         | 0.65         |      |           |                     |
| 24.0 | % selected      | 79.9         | 15.6         | 2.8          | 1.0          | 0.0          | 0.7  | 16.4/9.3  | 17.7                |
|      | # patients      | 25.42        | 13.59        | 5.79         | 2.33         | 0.69         |      |           |                     |
|      | Scenario 4      | (0.18, 0.20) | (0.28, 0.24) | (0.55, 0.28) | (0.74, 0.31) | (0.79, 0.33) |      |           |                     |
|      | $\delta^{true}$ | 0.44         | 0.46         | 0.62         | 0.76         | 0.78         |      |           |                     |
| 3.0  | % selected      | 4.5          | 3.8          | 8.4          | 21.2         | 61.3         | 0.8  | 27.5/13.6 | 99.1                |
|      | # patients      | 8.17         | 5.64         | 7.31         | 10.41        | 16.17        |      |           |                     |
| 4.5  | % selected      | 3.9          | 4.5          | 8.0          | 17.9         | 65.0         | 0.7  | 26.9/13.4 | 68.6                |
|      | # patients      | 8.44         | 6.32         | 7.31         | 10.00        | 15.65        |      |           |                     |
| 6.0  | % selected      | 2.7          | 3.8          | 7.9          | 18.7         | 65.3         | 1.6  | 26.4/13.3 | 52.2                |
|      | # patients      | 8.97         | 6.41         | 7.63         | 9.81         | 14.61        |      |           |                     |
| 12.0 | % selected      | 3.0          | 2.7          | 7.9          | 18.5         | 65.8         | 2.1  | 24.4/12.9 | 29.0                |
|      | # patients      | 10.92        | 7.49         | 8.55         | 9.33         | 10.98        |      |           |                     |
| 18.0 | % selected      | 2.0          | 2.0          | 7.6          | 19.5         | 65.2         | 3.7  | 22.4/12.5 | 21.0                |
|      | # patients      | 12.37        | 8.60         | 8.81         | 8.98         | 8.08         |      |           |                     |
| 24.0 | % selected      | 2.4          | 2.3          | 7.2          | 19.2         | 60.2         | 8.7  | 19.9/12.0 | 16.6                |
|      | # patients      | 14.77        | 9.47         | 8.58         | 7.43         | 5.50         |      |           |                     |
|      | Scenario 5      | (0.20, 0.10) | (0.50, 0.19) | (0.52, 0.23) | (0.54, 0.44) | (0.56, 0.54) |      |           |                     |
|      | $\delta^{true}$ | 0.55         | 0.69         | 0.66         | 0.45         | 0.38         |      |           |                     |
| 3.0  | % selected      | 14.0         | 49.8         | 32.9         | 2.8          | 0.4          | 0.1  | 21.6/10.5 | 99.5                |
|      | # patients      | 9.87         | 17.36        | 14.80        | 4.65         | 1.30         |      |           |                     |
| 4.5  | % selected      | 11.7         | 49.9         | 33.6         | 4.0          | 0.6          | 0.2  | 21.4/10.3 | 68.1                |
|      | # patients      | 10.19        | 16.93        | 14.89        | 4.68         | 1.24         |      |           |                     |
| 6.0  | % selected      | 11.5         | 49.5         | 32.9         | 5.6          | 0.3          | 0.2  | 21.3/10.5 | 52.6                |
|      | # patients      | 10.39        | 16.70        | 14.66        | 4.87         | 1.30         |      |           |                     |
| 12.0 | % selected      | 13.4         | 45.9         | 32.8         | 6.9          | 0.8          | 0.2  | 20.8/10.2 | 29.3                |
|      | # patients      | 12.17        | 16.11        | 13.49        | 4.62         | 1.54         |      |           |                     |
| 18.0 | % selected      | 13.4         | 41.1         | 32.3         | 10.7         | 2.0          | 0.5  | 20.5/10.0 | 21.6                |
|      | # patients      | 13.26        | 16.12        | 12.86        | 4.39         | 1.22         |      |           |                     |
| 24.0 | % selected      | 14.0         | 37.6         | 31.4         | 13.9         | 2.1          | 1.0  | 19.7/ 9.6 | 17.6                |
|      | # patients      | 15.40        | 15.38        | 11.45        | 4.17         | 1.34         |      |           |                     |

| LDI  |                 | Dose Level   |              |              |              |              | None | $N_E/N_T$ | Duration<br>(Weeks) |
|------|-----------------|--------------|--------------|--------------|--------------|--------------|------|-----------|---------------------|
|      |                 | 1            | 2            | 3            | 4            | 5            |      |           |                     |
|      | Scenario 6      | (0.20, 0.10) | (0.50, 0.19) | (0.52, 0.34) | (0.54, 0.44) | (0.56, 0.54) |      |           |                     |
|      | $\delta^{true}$ | 0.55         | 0.69         | 0.53         | 0.45         | 0.38         |      |           |                     |
| 3.0  | % selected      | 19.1         | 63.7         | 15.3         | 1.7          | 0.2          | 0.0  | 20.9/10.7 | 100.4               |
|      | # patients      | 11.73        | 21.16        | 10.96        | 3.21         | 0.94         |      |           |                     |
| 4.5  | % selected      | 18.4         | 63.5         | 16.0         | 2.0          | 0.1          | 0.0  | 20.7/10.7 | 68.8                |
|      | # patients      | 12.15        | 20.72        | 11.06        | 3.17         | 0.90         |      |           |                     |
| 6.0  | % selected      | 19.9         | 62.1         | 16.1         | 1.4          | 0.4          | 0.1  | 20.3/10.7 | 53.0                |
|      | # patients      | 13.25        | 19.94        | 10.57        | 3.27         | 0.92         |      |           |                     |
| 12.0 | % selected      | 24.7         | 54.5         | 17.0         | 3.1          | 0.4          | 0.3  | 19.9/10.7 | 29.5                |
|      | # patients      | 14.40        | 18.41        | 10.96        | 3.21         | 0.94         |      |           |                     |
| 18.0 | % selected      | 20.9         | 56.8         | 17.4         | 3.6          | 0.7          | 0.6  | 19.7/10.4 | 21.6                |
|      | # patients      | 14.87        | 17.69        | 10.83        | 3.44         | 0.98         |      |           |                     |
| 24.0 | % selected      | 18.9         | 52.0         | 20.6         | 5.7          | 0.8          | 2.0  | 19.3/10.3 | 17.4                |
|      | # patients      | 16.37        | 16.83        | 9.93         | 3.47         | 0.88         |      |           |                     |
|      | Scenario 7      | (0.02, 0.10) | (0.05, 0.25) | (0.30, 0.30) | (0.40, 0.55) | (0.50, 0.70) |      |           |                     |
|      | $\delta^{true}$ | 0.43         | 0.34         | 0.42         | 0.31         | 0.27         |      |           |                     |
| 3.0  | % selected      | 0.0          | 4.3          | 61.2         | 6.9          | 1.1          | 26.5 | 11.2/14.9 | 88.9                |
|      | # patients      | 4.09         | 7.84         | 20.54        | 6.61         | 3.84         |      |           |                     |
| 4.5  | % selected      | 0.0          | 4.3          | 60.1         | 6.7          | 1.1          | 27.8 | 11.1/15.0 | 60.2                |
|      | # patients      | 4.72         | 8.13         | 19.11        | 6.60         | 4.28         |      |           |                     |
| 6.0  | % selected      | 0.0          | 3.1          | 61.2         | 7.9          | 1.0          | 26.8 | 11.1/15.1 | 47.2                |
|      | # patients      | 5.13         | 8.55         | 18.47        | 6.75         | 4.79         |      |           |                     |
| 12.0 | % selected      | 0.0          | 4.0          | 57.6         | 8.8          | 2.3          | 27.3 | 10.8/15.6 | 26.4                |
|      | # patients      | 7.03         | 9.79         | 15.11        | 6.23         | 6.26         |      |           |                     |
| 18.0 | % selected      | 0.0          | 4.3          | 55.4         | 10.4         | 3.3          | 26.6 | 10.5/15.7 | 19.8                |
|      | # patients      | 8.84         | 10.39        | 13.07        | 6.08         | 7.06         |      |           |                     |
| 24.0 | % selected      | 0.0          | 4.6          | 56.4         | 10.7         | 5.7          | 22.6 | 10.1/15.5 | 16.6                |
|      | # patients      | 10.62        | 11.55        | 11.32        | 6.21         | 6.79         |      |           |                     |
|      | Scenario 8      | (0.02, 0.10) | (0.05, 0.25) | (0.35, 0.55) | (0.40, 0.60) | (0.50, 0.70) |      |           |                     |
|      | $\delta^{true}$ | 0.43         | 0.34         | 0.29         | 0.28         | 0.27         |      |           |                     |
| 3.0  | % selected      | 0.0          | 1.3          | 10.6         | 0.5          | 0.0          | 87.6 | 7.2/12.8  | 61.4                |
|      | # patients      | 4.14         | 8.01         | 13.18        | 3.56         | 1.57         |      |           |                     |
| 4.5  | % selected      | 0.0          | 1.8          | 11.8         | 0.3          | 0.1          | 86.0 | 7.3/13.1  | 42.9                |
|      | # patients      | 4.75         | 8.74         | 13.02        | 3.35         | 1.57         |      |           |                     |
| 6.0  | % selected      | 0.0          | 1.5          | 13.8         | 0.6          | 0.4          | 83.7 | 7.6/13.6  | 34.0                |
|      | # patients      | 5.22         | 8.77         | 13.33        | 3.82         | 2.02         |      |           |                     |
| 12.0 | % selected      | 0.0          | 2.5          | 16.0         | 1.4          | 0.2          | 79.9 | 8.4/15.2  | 20.7                |
|      | # patients      | 6.93         | 10.50        | 13.13        | 4.33         | 2.82         |      |           |                     |
| 18.0 | % selected      | 0.0          | 2.7          | 23.1         | 1.7          | 0.6          | 71.9 | 8.7/15.9  | 16.5                |
|      | # patients      | 8.98         | 12.11        | 12.10        | 4.80         | 3.44         |      |           |                     |
| 24.0 | % selected      | 0.0          | 3.4          | 26.8         | 3.5          | 1.3          | 65.0 | 8.8/16.3  | 14.7                |
|      | # patients      | 10.68        | 13.08        | 11.79        | 5.03         | 3.61         |      |           |                     |



Table S 4: Sensitivity analysis of the LO-EffTox design under different values of the logistical difficulty index (LDI) in Case 2. The probability pairs given in parentheses for each dose level are  $(\pi_E(d_r)^{true}, \pi_T(d_r)^{true})$ .

| LDI  |                 | Dose Level   |              |              |              |              | None | $N_E/N_T$ | Duration<br>(Days) |
|------|-----------------|--------------|--------------|--------------|--------------|--------------|------|-----------|--------------------|
|      |                 | 1            | 2            | 3            | 4            | 5            |      |           |                    |
|      | Scenario 1      | (0.05, 0.03) | (0.10, 0.05) | (0.20, 0.07) | (0.25, 0.08) | (0.35, 0.10) |      |           |                    |
|      | $\delta^{true}$ | 0.52         | 0.53         | 0.58         | 0.61         | 0.67         |      |           |                    |
| 9.0  | % selected      | 0.0          | 0.1          | 1.7          | 2.8          | 88.5         | 6.9  | 13.0/4.0  | 535                |
|      | # patients      | 3.39         | 3.62         | 4.88         | 4.41         | 29.75        |      |           |                    |
| 18.0 | % selected      | 0.0          | 0.3          | 1.7          | 3.6          | 87.0         | 7.4  | 12.6/3.8  | 308                |
|      | # patients      | 3.55         | 4.01         | 5.62         | 4.73         | 28.13        |      |           |                    |
| 36.0 | % selected      | 0.0          | 0.6          | 2.2          | 2.8          | 89.1         | 5.3  | 12.2/3.8  | 198                |
|      | # patients      | 3.72         | 4.94         | 7.26         | 5.68         | 24.92        |      |           |                    |
| 54.0 | % selected      | 0.0          | 0.2          | 1.8          | 4.9          | 86.9         | 6.2  | 12.0/3.7  | 159                |
|      | # patients      | 3.54         | 4.90         | 8.79         | 6.73         | 22.26        |      |           |                    |
|      | Scenario 2      | (0.02, 0.10) | (0.10, 0.15) | (0.40, 0.20) | (0.45, 0.30) | (0.50, 0.60) |      |           |                    |
|      | $\delta^{true}$ | 0.43         | 0.43         | 0.59         | 0.52         | 0.32         |      |           |                    |
| 9.0  | % selected      | 0.0          | 8.6          | 68.6         | 19.0         | 3.1          | 0.7  | 16.8/12.5 | 560                |
|      | # patients      | 3.31         | 7.70         | 19.65        | 10.51        | 6.57         |      |           |                    |
| 18.0 | % selected      | 0.0          | 10.5         | 64.1         | 18.7         | 5.4          | 1.3  | 16.3/12.6 | 320                |
|      | # patients      | 3.38         | 8.39         | 18.69        | 10.07        | 7.00         |      |           |                    |
| 36.0 | % selected      | 0.1          | 12.5         | 60.6         | 20.9         | 5.0          | 0.9  | 16.2/12.7 | 207                |
|      | # patients      | 3.35         | 8.92         | 18.25        | 9.88         | 7.32         |      |           |                    |
| 54.0 | % selected      | 0.0          | 10.5         | 58.3         | 21.8         | 8.2          | 1.2  | 16.0/12.4 | 166                |
|      | # patients      | 3.38         | 9.71         | 17.88        | 9.47         | 7.21         |      |           |                    |
|      | Scenario 3      | (0.30, 0.10) | (0.35, 0.20) | (0.45, 0.40) | (0.50, 0.60) | (0.55, 0.65) |      |           |                    |
|      | $\delta^{true}$ | 0.63         | 0.55         | 0.43         | 0.32         | 0.31         |      |           |                    |
| 9.0  | % selected      | 68.3         | 27.6         | 3.6          | 0.3          | 0.0          | 0.2  | 16.3/8.8  | 561                |
|      | # patients      | 26.32        | 14.43        | 5.30         | 1.56         | 0.32         |      |           |                    |
| 18.0 | % selected      | 70.1         | 26.4         | 2.9          | 0.2          | 0.0          | 0.4  | 16.5/9.1  | 325                |
|      | # patients      | 26.21        | 13.76        | 5.64         | 1.83         | 0.45         |      |           |                    |
| 36.0 | % selected      | 70.9         | 25.7         | 3.1          | 0.0          | 0.0          | 0.3  | 16.5/9.2  | 206                |
|      | # patients      | 25.78        | 13.93        | 5.59         | 2.08         | 0.52         |      |           |                    |
| 54.0 | % selected      | 68.2         | 27.4         | 3.0          | 1.0          | 0.0          | 0.4  | 16.6/9.4  | 168                |
|      | # patients      | 25.26        | 14.09        | 5.87         | 2.19         | 0.52         |      |           |                    |
|      | Scenario 4      | (0.18, 0.20) | (0.28, 0.24) | (0.55, 0.28) | (0.74, 0.31) | (0.79, 0.33) |      |           |                    |
|      | $\delta^{true}$ | 0.44         | 0.46         | 0.62         | 0.76         | 0.78         |      |           |                    |
| 9.0  | % selected      | 5.6          | 4.8          | 8.8          | 20.2         | 59.7         | 0.9  | 27.3/13.6 | 561                |
|      | # patients      | 8.66         | 5.34         | 7.23         | 10.06        | 16.37        |      |           |                    |
| 18.0 | % selected      | 3.9          | 3.7          | 8.2          | 21.6         | 61.7         | 0.9  | 27.1/13.4 | 324                |
|      | # patients      | 8.87         | 5.71         | 6.86         | 11.12        | 15.11        |      |           |                    |
| 36.0 | % selected      | 4.7          | 4.8          | 8.2          | 24.0         | 57.3         | 1.0  | 26.2/13.5 | 206                |
|      | # patients      | 9.78         | 6.08         | 7.81         | 11.89        | 12.12        |      |           |                    |
| 54.0 | % selected      | 3.9          | 3.0          | 9.3          | 20.2         | 62.7         | 0.9  | 25.4/13.1 | 167                |
|      | # patients      | 10.01        | 6.82         | 8.69         | 11.01        | 11.21        |      |           |                    |

| LDI  |                 | Dose Level   |              |              |              |              | None | $N_E/N_T$ | Duration<br>(Days) |
|------|-----------------|--------------|--------------|--------------|--------------|--------------|------|-----------|--------------------|
|      |                 | 1            | 2            | 3            | 4            | 5            |      |           |                    |
|      | Scenario 5      | (0.20, 0.10) | (0.50, 0.19) | (0.52, 0.23) | (0.54, 0.44) | (0.56, 0.54) |      |           |                    |
|      | $\delta^{true}$ | 0.55         | 0.69         | 0.66         | 0.45         | 0.38         |      |           |                    |
| 9.0  | % selected      | 10.8         | 49.0         | 37.4         | 2.6          | 0.2          | 0.0  | 21.8/10.5 | 562                |
|      | # patients      | 8.80         | 17.56        | 16.06        | 4.39         | 1.19         |      |           |                    |
| 18.0 | % selected      | 14.7         | 48.5         | 33.2         | 3.0          | 0.6          | 0.0  | 21.7/10.4 | 322                |
|      | # patients      | 9.55         | 17.45        | 14.88        | 4.87         | 1.25         |      |           |                    |
| 36.0 | % selected      | 13.1         | 47.3         | 33.4         | 5.4          | 0.8          | 0.0  | 21.6/10.4 | 207                |
|      | # patients      | 9.62         | 17.22        | 14.60        | 5.20         | 1.36         |      |           |                    |
| 54.0 | % selected      | 12.2         | 46.1         | 32.7         | 7.9          | 1.1          | 0.0  | 21.2/10.2 | 169                |
|      | # patients      | 10.93        | 16.54        | 14.51        | 4.85         | 1.17         |      |           |                    |
|      | Scenario 6      | (0.20, 0.10) | (0.50, 0.19) | (0.52, 0.34) | (0.54, 0.44) | (0.56, 0.54) |      |           |                    |
|      | $\delta^{true}$ | 0.55         | 0.69         | 0.53         | 0.45         | 0.38         |      |           |                    |
| 9.0  | % selected      | 17.7         | 65.3         | 15.1         | 1.8          | 0.1          | 0.0  | 21.2/11.0 | 560                |
|      | # patients      | 10.96        | 22.05        | 10.81        | 3.28         | 0.90         |      |           |                    |
| 18.0 | % selected      | 17.3         | 68.0         | 12.9         | 1.3          | 0.5          | 0.0  | 20.9/10.8 | 326                |
|      | # patients      | 11.32        | 21.77        | 10.67        | 3.33         | 0.92         |      |           |                    |
| 36.0 | % selected      | 20.5         | 62.9         | 14.0         | 1.8          | 0.7          | 0.1  | 20.9/10.8 | 207                |
|      | # patients      | 12.10        | 20.59        | 10.73        | 3.56         | 0.99         |      |           |                    |
| 54.0 | % selected      | 20.9         | 58.8         | 15.9         | 3.5          | 0.9          | 0.0  | 20.3/10.8 | 168                |
|      | # patients      | 13.27        | 19.14        | 11.20        | 3.54         | 0.86         |      |           |                    |
|      | Scenario 7      | (0.02, 0.10) | (0.05, 0.25) | (0.30, 0.30) | (0.40, 0.55) | (0.50, 0.70) |      |           |                    |
|      | $\delta^{true}$ | 0.43         | 0.34         | 0.42         | 0.31         | 0.27         |      |           |                    |
| 9.0  | % selected      | 0.0          | 3.1          | 63.9         | 5.6          | 0.6          | 26.8 | 11.1/14.3 | 479                |
|      | # patients      | 3.20         | 6.60         | 22.56        | 6.48         | 3.06         |      |           |                    |
| 18.0 | % selected      | 0.0          | 3.5          | 61.1         | 5.3          | 0.7          | 29.4 | 11.2/14.5 | 268                |
|      | # patients      | 3.20         | 6.76         | 21.64        | 6.31         | 3.49         |      |           |                    |
| 36.0 | % selected      | 0.0          | 4.1          | 58.2         | 6.5          | 0.9          | 30.3 | 11.3/14.6 | 166                |
|      | # patients      | 3.25         | 6.79         | 20.82        | 6.39         | 4.07         |      |           |                    |
| 54.0 | % selected      | 0.0          | 4.2          | 58.7         | 5.3          | 1.0          | 30.8 | 11.5/15.0 | 134                |
|      | # patients      | 3.28         | 6.95         | 20.98        | 6.41         | 4.52         |      |           |                    |
|      | Scenario 8      | (0.02, 0.10) | (0.05, 0.25) | (0.35, 0.55) | (0.40, 0.60) | (0.50, 0.70) |      |           |                    |
|      | $\delta^{true}$ | 0.43         | 0.34         | 0.29         | 0.28         | 0.27         |      |           |                    |
| 9.0  | % selected      | 0.0          | 2.1          | 9.7          | 0.1          | 0.0          | 88.1 | 7.2/12.5  | 299                |
|      | # patients      | 3.30         | 7.29         | 13.37        | 3.48         | 1.27         |      |           |                    |
| 18.0 | % selected      | 0.0          | 1.5          | 8.8          | 0.3          | 0.1          | 89.3 | 7.2/12.6  | 156                |
|      | # patients      | 3.23         | 7.14         | 13.05        | 3.74         | 1.38         |      |           |                    |
| 36.0 | % selected      | 0.0          | 1.7          | 10.1         | 0.2          | 0.0          | 88.0 | 8.0/13.8  | 93                 |
|      | # patients      | 3.33         | 7.17         | 13.93        | 4.37         | 1.94         |      |           |                    |
| 54.0 | % selected      | 0.0          | 2.6          | 9.5          | 0.2          | 0.0          | 87.7 | 8.9/15.0  | 75                 |
|      | # patients      | 3.21         | 7.42         | 15.24        | 4.53         | 2.56         |      |           |                    |

Table S5: Sensitivity analysis of the LO-EffTox design under different  $N_{\max}$  in Case 1. The probability pairs given in parentheses for each dose level are  $(\pi_E(d_r)^{true}, \pi_T(d_r)^{true})$ .

| $N_{\max}$ |                 | Dose Level   |              |              |              |              | None | $N_E/N_T$ | Duration<br>(Weeks) |
|------------|-----------------|--------------|--------------|--------------|--------------|--------------|------|-----------|---------------------|
|            |                 | 1            | 2            | 3            | 4            | 5            |      |           |                     |
|            | Scenario 1      | (0.05, 0.03) | (0.10, 0.05) | (0.20, 0.07) | (0.25, 0.08) | (0.35, 0.10) |      |           |                     |
|            | $\delta^{true}$ | 0.52         | 0.53         | 0.58         | 0.61         | 0.67         |      |           |                     |
| 24         | % selected      | 0.1          | 2.3          | 4.8          | 11.4         | 80.0         | 1.4  | 4.0/1.4   | 21.2                |
|            | # patients      | 5.94         | 6.17         | 5.39         | 3.41         | 3.09         |      |           |                     |
| 36         | % selected      | 0.0          | 1.0          | 2.7          | 3.4          | 90.5         | 2.4  | 7.7/2.6   | 28.9                |
|            | # patients      | 6.11         | 6.55         | 6.44         | 4.45         | 12.31        |      |           |                     |
| 60         | % selected      | 0.0          | 0.1          | 1.7          | 3.0          | 90.3         | 4.9  | 15.4/4.7  | 44.1                |
|            | # patients      | 6.00         | 6.69         | 7.10         | 5.60         | 33.52        |      |           |                     |
| 72         | % selected      | 0.0          | 0.1          | 1.5          | 3.1          | 91.6         | 3.7  | 19.5/6.1  | 52.7                |
|            | # patients      | 5.92         | 6.61         | 7.63         | 6.18         | 44.35        |      |           |                     |
|            | Scenario 2      | (0.02, 0.10) | (0.10, 0.15) | (0.40, 0.20) | (0.45, 0.30) | (0.50, 0.60) |      |           |                     |
|            | $\delta^{true}$ | 0.43         | 0.43         | 0.59         | 0.52         | 0.32         |      |           |                     |
| 24         | % selected      | 0.4          | 10.9         | 21.7         | 24.7         | 42.1         | 0.2  | 5.9/ 5.3  | 21.3                |
|            | # patients      | 5.92         | 6.38         | 5.38         | 3.69         | 2.60         |      |           |                     |
| 36         | % selected      | 0.0          | 15.4         | 49.7         | 23.6         | 10.6         | 0.7  | 10.8/ 9.9 | 29.3                |
|            | # patients      | 5.90         | 7.49         | 8.33         | 6.34         | 7.78         |      |           |                     |
| 60         | % selected      | 0.0          | 8.3          | 70.1         | 15.9         | 4.3          | 1.4  | 19.8/15.7 | 45.1                |
|            | # patients      | 6.11         | 10.41        | 21.88        | 11.66        | 9.40         |      |           |                     |
| 72         | % selected      | 0.0          | 6.4          | 72.8         | 17.7         | 2.1          | 1.0  | 24.6/18.5 | 52.6                |
|            | # patients      | 6.08         | 11.85        | 29.08        | 14.34        | 10.10        |      |           |                     |
|            | Scenario 3      | (0.30, 0.10) | (0.35, 0.20) | (0.45, 0.40) | (0.50, 0.60) | (0.55, 0.65) |      |           |                     |
|            | $\delta^{true}$ | 0.63         | 0.55         | 0.43         | 0.32         | 0.31         |      |           |                     |
| 24         | % selected      | 64.4         | 24.5         | 7.8          | 2.6          | 0.5          | 0.2  | 8.6/ 5.2  | 21.4                |
|            | # patients      | 10.59        | 7.51         | 3.89         | 1.57         | 0.41         |      |           |                     |
| 36         | % selected      | 72.9         | 22.7         | 3.2          | 0.9          | 0.0          | 0.3  | 12.5/ 7.2 | 29.2                |
|            | # patients      | 18.23        | 10.71        | 4.76         | 1.68         | 0.55         |      |           |                     |
| 60         | % selected      | 75.6         | 22.4         | 1.5          | 0.2          | 0.0          | 0.3  | 19.9/10.4 | 45.5                |
|            | # patients      | 35.42        | 16.43        | 5.58         | 1.90         | 0.60         |      |           |                     |
| 72         | % selected      | 81.1         | 17.8         | 0.8          | 0.3          | 0.0          | 0.0  | 23.9/12.0 | 53.2                |
|            | # patients      | 45.72        | 18.19        | 5.71         | 1.89         | 0.49         |      |           |                     |
|            | Scenario 4      | (0.18, 0.20) | (0.28, 0.24) | (0.55, 0.28) | (0.74, 0.31) | (0.79, 0.33) |      |           |                     |
|            | $\delta^{true}$ | 0.44         | 0.46         | 0.62         | 0.76         | 0.78         |      |           |                     |
| 24         | % selected      | 7.7          | 4.7          | 11.6         | 29.1         | 45.7         | 1.2  | 9.6/ 6.0  | 21.1                |
|            | # patients      | 8.01         | 5.86         | 4.92         | 3.35         | 1.69         |      |           |                     |
| 36         | % selected      | 3.9          | 3.1          | 8.9          | 21.9         | 61.0         | 1.2  | 17.6/ 9.6 | 29.2                |
|            | # patients      | 8.92         | 6.43         | 6.71         | 7.30         | 6.36         |      |           |                     |
| 60         | % selected      | 2.9          | 2.5          | 7.5          | 17.0         | 69.0         | 1.1  | 34.1/16.8 | 45.0                |
|            | # patients      | 10.52        | 7.06         | 9.29         | 12.49        | 20.13        |      |           |                     |
| 72         | % selected      | 1.9          | 3.1          | 6.2          | 19.1         | 66.9         | 2.8  | 42.2/20.5 | 51.9                |
|            | # patients      | 9.98         | 8.07         | 10.26        | 15.19        | 26.81        |      |           |                     |

| $N_{\max}$ |                 | Dose Level   |              |              |              |              | None | $N_E/N_T$ | Duration<br>(Weeks) |
|------------|-----------------|--------------|--------------|--------------|--------------|--------------|------|-----------|---------------------|
|            |                 | 1            | 2            | 3            | 4            | 5            |      |           |                     |
|            | Scenario 5      | (0.20, 0.10) | (0.50, 0.19) | (0.52, 0.23) | (0.54, 0.44) | (0.56, 0.54) |      |           |                     |
|            | $\delta^{true}$ | 0.55         | 0.69         | 0.66         | 0.45         | 0.38         |      |           |                     |
| 24         | % selected      | 12.8         | 30.4         | 33.5         | 19.5         | 3.7          | 0.1  | 10.0/ 4.9 | 21.3                |
|            | # patients      | 7.66         | 7.14         | 6.15         | 2.35         | 0.68         |      |           |                     |
| 36         | % selected      | 14.1         | 41.1         | 31.8         | 11.7         | 1.2          | 0.1  | 15.5/ 7.7 | 29.2                |
|            | # patients      | 9.30         | 11.21        | 10.37        | 3.95         | 1.16         |      |           |                     |
| 60         | % selected      | 12.9         | 52.3         | 29.5         | 4.8          | 0.3          | 0.2  | 26.9/12.9 | 45.2                |
|            | # patients      | 13.19        | 22.78        | 17.58        | 5.01         | 1.34         |      |           |                     |
| 72         | % selected      | 11.1         | 53.7         | 31.5         | 3.5          | 0.2          | 0.0  | 32.3/15.1 | 53.2                |
|            | # patients      | 14.75        | 28.54        | 21.64        | 5.53         | 1.54         |      |           |                     |
|            | Scenario 6      | (0.20, 0.10) | (0.50, 0.19) | (0.52, 0.34) | (0.54, 0.44) | (0.56, 0.54) |      |           |                     |
|            | $\delta^{true}$ | 0.55         | 0.69         | 0.53         | 0.45         | 0.38         |      |           |                     |
| 24         | % selected      | 21.3         | 40.5         | 25.2         | 10.6         | 2.3          | 0.1  | 9.9/ 5.4  | 21.3                |
|            | # patients      | 7.95         | 7.84         | 5.66         | 2.04         | 0.49         |      |           |                     |
| 36         | % selected      | 21.7         | 50.3         | 22.4         | 4.4          | 1.2          | 0.0  | 15.2/ 8.1 | 29.4                |
|            | # patients      | 10.74        | 13.19        | 8.58         | 2.66         | 0.83         |      |           |                     |
| 60         | % selected      | 18.1         | 65.6         | 14.3         | 1.6          | 0.0          | 0.4  | 25.8/13.1 | 45.4                |
|            | # patients      | 15.63        | 26.57        | 13.04        | 3.55         | 1.05         |      |           |                     |
| 72         | % selected      | 17.5         | 70.2         | 10.8         | 0.9          | 0.2          | 0.4  | 30.8/15.3 | 53.0                |
|            | # patients      | 18.36        | 34.74        | 14.06        | 3.56         | 1.03         |      |           |                     |
|            | Scenario 7      | (0.02, 0.10) | (0.05, 0.25) | (0.30, 0.30) | (0.40, 0.55) | (0.50, 0.70) |      |           |                     |
|            | $\delta^{true}$ | 0.43         | 0.34         | 0.42         | 0.31         | 0.27         |      |           |                     |
| 24         | % selected      | 0.1          | 10.8         | 37.2         | 23.6         | 19.0         | 9.3  | 4.2/ 6.9  | 20.7                |
|            | # patients      | 6.13         | 6.97         | 5.91         | 2.92         | 1.70         |      |           |                     |
| 36         | % selected      | 0.0          | 7.2          | 55.7         | 13.1         | 5.9          | 18.1 | 8.0/11.9  | 27.7                |
|            | # patients      | 6.21         | 8.51         | 10.04        | 4.91         | 4.93         |      |           |                     |
| 60         | % selected      | 0.0          | 2.1          | 61.3         | 6.0          | 0.4          | 30.2 | 13.5/18.2 | 38.7                |
|            | # patients      | 6.11         | 9.62         | 24.20        | 7.05         | 5.87         |      |           |                     |
| 72         | % selected      | 0.0          | 1.7          | 60.4         | 3.1          | 0.2          | 34.6 | 15.9/20.8 | 44.3                |
|            | # patients      | 6.26         | 10.13        | 30.86        | 7.80         | 6.00         |      |           |                     |
|            | Scenario 8      | (0.02, 0.10) | (0.05, 0.25) | (0.35, 0.55) | (0.40, 0.60) | (0.50, 0.70) |      |           |                     |
|            | $\delta^{true}$ | 0.43         | 0.34         | 0.29         | 0.28         | 0.27         |      |           |                     |
| 24         | % selected      | 0.4          | 12.5         | 40.0         | 13.3         | 5.6          | 28.2 | 4.2/ 8.0  | 20.4                |
|            | # patients      | 6.10         | 7.61         | 6.32         | 2.38         | 0.91         |      |           |                     |
| 36         | % selected      | 0.0          | 5.4          | 31.0         | 2.4          | 0.8          | 60.4 | 6.8/12.4  | 24.1                |
|            | # patients      | 6.15         | 9.03         | 10.30        | 3.71         | 2.40         |      |           |                     |
| 60         | % selected      | 0.0          | 0.5          | 7.0          | 0.3          | 0.0          | 92.2 | 8.6/15.5  | 25.6                |
|            | # patients      | 5.96         | 9.93         | 15.10        | 3.82         | 2.48         |      |           |                     |
| 72         | % selected      | 0.0          | 0.3          | 3.6          | 0.1          | 0.0          | 96.0 | 9.3/16.4  | 26.4                |
|            | # patients      | 6.08         | 10.69        | 15.84        | 4.29         | 2.52         |      |           |                     |

Table S6: Sensitivity analysis of the LO-EffTox design under different time-to-event distributions in Case 1. In the first column, the first and second letters indicate the distributions for time to efficacy and toxicity, respectively, with "W" and "L" denoting the Weibull and log-logistic distributions. The probability pairs given in parentheses for each dose level are  $(\pi_E(d_r)^{true}, \pi_T(d_r)^{true})$ .

| Dist. |                 | Dose Level   |              |              |              |              |      | $N_E/N_T$ | Duration<br>(Weeks) |
|-------|-----------------|--------------|--------------|--------------|--------------|--------------|------|-----------|---------------------|
|       |                 | 1            | 2            | 3            | 4            | 5            | None |           |                     |
|       | Scenario 1      | (0.05, 0.03) | (0.10, 0.05) | (0.20, 0.07) | (0.25, 0.08) | (0.35, 0.10) |      |           |                     |
|       | $\delta^{true}$ | 0.52         | 0.53         | 0.58         | 0.61         | 0.67         |      |           |                     |
| LL    | % selected      | 0.0          | 0.3          | 2.2          | 2.8          | 91.6         | 3.1  | 11.6/3.7  | 36.9                |
|       | # patients      | 6.02         | 6.65         | 6.81         | 4.90         | 23.19        |      |           |                     |
| LW    | % selected      | 0.1          | 0.2          | 3.0          | 2.4          | 91.7         | 2.6  | 11.6/3.6  | 36.9                |
|       | # patients      | 6.06         | 6.65         | 6.89         | 4.94         | 23.16        |      |           |                     |
| WL    | % selected      | 0.0          | 0.1          | 2.5          | 2.4          | 91.3         | 3.7  | 11.7/3.7  | 36.6                |
|       | # patients      | 6.11         | 6.50         | 7.02         | 4.82         | 22.96        |      |           |                     |
|       | Scenario 2      | (0.02, 0.10) | (0.10, 0.15) | (0.40, 0.20) | (0.45, 0.30) | (0.50, 0.60) |      |           |                     |
|       | $\delta^{true}$ | 0.43         | 0.43         | 0.59         | 0.52         | 0.32         |      |           |                     |
| LL    | % selected      | 0.0          | 10.9         | 59.6         | 23.5         | 5.7          | 0.3  | 15.6/13.2 | 37.1                |
|       | # patients      | 5.97         | 9.17         | 14.05        | 9.65         | 9.08         |      |           |                     |
| LW    | % selected      | 0.1          | 12.1         | 63.2         | 18.9         | 5.1          | 0.6  | 15.4/13.1 | 37.4                |
|       | # patients      | 5.89         | 9.51         | 14.08        | 9.46         | 8.88         |      |           |                     |
| WL    | % selected      | 0.1          | 11.8         | 63.3         | 20.1         | 4.3          | 0.4  | 15.6/13.2 | 37.1                |
|       | # patients      | 6.02         | 9.01         | 13.96        | 9.52         | 9.38         |      |           |                     |
|       | Scenario 3      | (0.30, 0.10) | (0.35, 0.20) | (0.45, 0.40) | (0.50, 0.60) | (0.55, 0.65) |      |           |                     |
|       | $\delta^{true}$ | 0.63         | 0.55         | 0.43         | 0.32         | 0.31         |      |           |                     |
| LL    | % selected      | 75.5         | 22.3         | 1.8          | 0.2          | 0.0          | 0.2  | 16.5/ 8.9 | 37.5                |
|       | # patients      | 26.64        | 13.58        | 5.42         | 1.79         | 0.49         |      |           |                     |
| LW    | % selected      | 78.4         | 18.4         | 2.3          | 0.7          | 0.0          | 0.2  | 16.4/8.8  | 37.3                |
|       | # patients      | 27.53        | 12.88        | 5.20         | 1.81         | 0.51         |      |           |                     |
| WL    | % selected      | 79.1         | 17.2         | 3.0          | 0.5          | 0.0          | 0.2  | 16.3/8.8  | 37.5                |
|       | # patients      | 27.47        | 12.92        | 5.21         | 1.81         | 0.54         |      |           |                     |
|       | Scenario 4      | (0.18, 0.20) | (0.28, 0.24) | (0.55, 0.28) | (0.74, 0.31) | (0.79, 0.33) |      |           |                     |
|       | $\delta^{true}$ | 0.44         | 0.46         | 0.62         | 0.76         | 0.78         |      |           |                     |
| LL    | % selected      | 3.1          | 3.0          | 9.6          | 17.5         | 64.9         | 1.9  | 25.6/13.2 | 36.8                |
|       | # patients      | 9.57         | 7.01         | 7.94         | 9.96         | 12.82        |      |           |                     |
| LW    | % selected      | 4.1          | 3.4          | 6.5          | 20.6         | 63.9         | 1.5  | 25.5/13.2 | 37.1                |
|       | # patients      | 9.97         | 6.96         | 8.12         | 10.14        | 12.27        |      |           |                     |
| WL    | % selected      | 3.8          | 3.0          | 8.4          | 19.0         | 64.6         | 1.2  | 25.4/13.1 | 36.8                |
|       | # patients      | 10.04        | 7.33         | 8.13         | 9.36         | 12.68        |      |           |                     |

| Dist. |                 | Dose Level   |              |              |              |              | None | $N_E/N_T$ | Duration<br>(Weeks) |
|-------|-----------------|--------------|--------------|--------------|--------------|--------------|------|-----------|---------------------|
|       |                 | 1            | 2            | 3            | 4            | 5            |      |           |                     |
|       | Scenario 5      | (0.20, 0.10) | (0.50, 0.19) | (0.52, 0.23) | (0.54, 0.44) | (0.56, 0.54) |      |           |                     |
|       | $\delta^{true}$ | 0.55         | 0.69         | 0.66         | 0.45         | 0.38         |      |           |                     |
| LL    | % selected      | 13.3         | 48.0         | 33.9         | 4.1          | 0.5          | 0.2  | 21.1/10.3 | 37.3                |
|       | # patients      | 11.53        | 16.48        | 14.14        | 4.47         | 1.30         |      |           |                     |
| LW    | % selected      | 11.1         | 47.6         | 35.0         | 5.2          | 1.0          | 0.1  | 21.1/10.3 | 37.3                |
|       | # patients      | 11.19        | 16.60        | 13.97        | 4.84         | 1.36         |      |           |                     |
| WL    | % selected      | 13.3         | 48.0         | 32.8         | 5.0          | 0.5          | 0.4  | 21.0/10.3 | 37.2                |
|       | # patients      | 11.26        | 16.84        | 13.86        | 4.55         | 1.34         |      |           |                     |
|       | Scenario 6      | (0.20, 0.10) | (0.50, 0.19) | (0.52, 0.34) | (0.54, 0.44) | (0.56, 0.54) |      |           |                     |
|       | $\delta^{true}$ | 0.55         | 0.69         | 0.53         | 0.45         | 0.38         |      |           |                     |
| LL    | % selected      | 21.6         | 59.0         | 16.3         | 2.7          | 0.2          | 0.2  | 20.2/10.7 | 37.2                |
|       | # patients      | 13.88        | 18.23        | 11.32        | 3.43         | 1.06         |      |           |                     |
| LW    | % selected      | 18.9         | 64.5         | 14.1         | 2.0          | 0.2          | 0.3  | 20.3/10.6 | 37.3                |
|       | # patients      | 13.24        | 19.69        | 10.48        | 3.44         | 1.04         |      |           |                     |
| WL    | % selected      | 19.5         | 60.9         | 16.9         | 2.0          | 0.6          | 0.1  | 20.4/10.8 | 37.2                |
|       | # patients      | 13.33        | 19.09        | 11.24        | 3.32         | 0.98         |      |           |                     |
|       | Scenario 7      | (0.02, 0.10) | (0.05, 0.25) | (0.30, 0.30) | (0.40, 0.55) | (0.50, 0.70) |      |           |                     |
|       | $\delta^{true}$ | 0.43         | 0.34         | 0.42         | 0.31         | 0.27         |      |           |                     |
| LL    | % selected      | 0.0          | 4.5          | 58.1         | 8.1          | 1.4          | 27.9 | 11.1/15.7 | 33.1                |
|       | # patients      | 5.98         | 9.61         | 16.35        | 6.29         | 5.71         |      |           |                     |
| LW    | % selected      | 0.0          | 4.4          | 59.5         | 9.0          | 1.0          | 26.1 | 10.9/15.3 | 33.4                |
|       | # patients      | 6.20         | 9.14         | 16.60        | 6.52         | 5.55         |      |           |                     |
| WL    | % selected      | 0.0          | 3.2          | 59.5         | 9.4          | 1.4          | 26.5 | 10.8/15.3 | 33.5                |
|       | # patients      | 6.14         | 9.48         | 16.42        | 6.34         | 5.68         |      |           |                     |
|       | Scenario 8      | (0.02, 0.10) | (0.05, 0.25) | (0.35, 0.55) | (0.40, 0.60) | (0.50, 0.70) |      |           |                     |
|       | $\delta^{true}$ | 0.43         | 0.34         | 0.29         | 0.28         | 0.27         |      |           |                     |
| LL    | % selected      | 0.0          | 2.5          | 16.7         | 0.8          | 0.3          | 79.7 | 8.3/14.9  | 25.9                |
|       | # patients      | 6.28         | 9.94         | 13.63        | 4.12         | 2.55         |      |           |                     |
| LW    | % selected      | 0.0          | 2.4          | 15.3         | 0.8          | 0.3          | 81.2 | 8.3/14.8  | 25.9                |
|       | # patients      | 6.38         | 9.82         | 13.41        | 4.17         | 2.67         |      |           |                     |
| WL    | % selected      | 0.0          | 2.0          | 16.6         | 0.9          | 0.3          | 80.2 | 8.2/14.8  | 25.9                |
|       | # patients      | 6.23         | 9.58         | 13.77        | 4.23         | 2.52         |      |           |                     |

Table S7: Sensitivity analysis of the LO-EffTox design under different numbers of partitions for the piecewise exponential model in Case 1. The probability pairs given in parentheses for each dose level are  $(\pi_E(d_r)^{true}, \pi_T(d_r)^{true})$ .

| # of partitions |                 | Dose Level   |              |              |              |              | None | $N_E/N_T$ | Duration (Weeks) |
|-----------------|-----------------|--------------|--------------|--------------|--------------|--------------|------|-----------|------------------|
|                 |                 | 1            | 2            | 3            | 4            | 5            |      |           |                  |
|                 | Scenario 1      | (0.05, 0.03) | (0.10, 0.05) | (0.20, 0.07) | (0.25, 0.08) | (0.35, 0.10) |      |           |                  |
|                 | $\delta^{true}$ | 0.52         | 0.53         | 0.58         | 0.61         | 0.67         |      |           |                  |
| 9               | % selected      | 0.1          | 0.8          | 2.4          | 2.7          | 90.8         | 3.2  | 11.7/3.8  | 36.8             |
|                 | # patients      | 5.89         | 6.68         | 6.95         | 4.89         | 23.09        |      |           |                  |
| 12              | % selected      | 0.0          | 0.6          | 2.4          | 2.5          | 90.1         | 4.4  | 11.6/3.7  | 36.8             |
|                 | # patients      | 5.70         | 6.63         | 6.71         | 4.94         | 23.49        |      |           |                  |
|                 | Scenario 2      | (0.02, 0.10) | (0.10, 0.15) | (0.40, 0.20) | (0.45, 0.30) | (0.50, 0.60) |      |           |                  |
|                 | $\delta^{true}$ | 0.43         | 0.43         | 0.59         | 0.52         | 0.32         |      |           |                  |
| 9               | % selected      | 0.0          | 13.5         | 62.9         | 17.7         | 5.3          | 0.6  | 15.4/13.0 | 37.1             |
|                 | # patients      | 5.71         | 9.26         | 14.29        | 9.22         | 9.35         |      |           |                  |
| 12              | % selected      | 0.1          | 12.7         | 62.1         | 18.6         | 5.4          | 1.1  | 15.5/13.2 | 37.0             |
|                 | # patients      | 5.74         | 9.20         | 14.39        | 9.13         | 9.24         |      |           |                  |
|                 | Scenario 3      | (0.30, 0.10) | (0.35, 0.20) | (0.45, 0.40) | (0.50, 0.60) | (0.55, 0.65) |      |           |                  |
|                 | $\delta^{true}$ | 0.63         | 0.55         | 0.43         | 0.32         | 0.31         |      |           |                  |
| 9               | % selected      | 77.8         | 19.2         | 1.9          | 0.6          | 0.0          | 0.5  | 16.4/8.9  | 37.1             |
|                 | # patients      | 27.06        | 13.47        | 4.97         | 1.81         | 0.52         |      |           |                  |
| 12              | % selected      | 74.8         | 22.2         | 2.3          | 0.6          | 0.0          | 0.1  | 16.3/8.9  | 37.3             |
|                 | # patients      | 26.82        | 13.55        | 5.17         | 1.85         | 0.57         |      |           |                  |
|                 | Scenario 4      | (0.18, 0.20) | (0.28, 0.24) | (0.55, 0.28) | (0.74, 0.31) | (0.79, 0.33) |      |           |                  |
|                 | $\delta^{true}$ | 0.44         | 0.46         | 0.62         | 0.76         | 0.78         |      |           |                  |
| 9               | % selected      | 2.8          | 3.0          | 8.5          | 20.0         | 63.4         | 2.3  | 25.7/13.2 | 36.8             |
|                 | # patients      | 9.45         | 6.79         | 8.14         | 10.10        | 12.67        |      |           |                  |
| 12              | % selected      | 2.9          | 3.1          | 7.1          | 19.7         | 66.0         | 1.2  | 25.8/13.2 | 37.1             |
|                 | # patients      | 9.18         | 6.96         | 7.91         | 9.99         | 13.50        |      |           |                  |
|                 | Scenario 5      | (0.20, 0.10) | (0.50, 0.19) | (0.52, 0.23) | (0.54, 0.44) | (0.56, 0.54) |      |           |                  |
|                 | $\delta^{true}$ | 0.55         | 0.69         | 0.66         | 0.45         | 0.38         |      |           |                  |
| 9               | % selected      | 14.7         | 48.3         | 30.8         | 5.0          | 0.9          | 0.3  | 21.2/10.4 | 37.2             |
|                 | # patients      | 11.27        | 16.43        | 14.24        | 4.55         | 1.41         |      |           |                  |
| 12              | % selected      | 13.3         | 48.6         | 32.3         | 5.0          | 0.8          | 0.0  | 21.3/10.4 | 37.3             |
|                 | # patients      | 11.01        | 16.76        | 13.89        | 4.89         | 1.46         |      |           |                  |

| # of<br>partitions |                 | Dose Level   |              |              |              |              | None | $N_E/N_T$ | Duration<br>(Weeks) |
|--------------------|-----------------|--------------|--------------|--------------|--------------|--------------|------|-----------|---------------------|
|                    |                 | 1            | 2            | 3            | 4            | 5            |      |           |                     |
|                    | Scenario 6      | (0.20, 0.10) | (0.50, 0.19) | (0.52, 0.34) | (0.54, 0.44) | (0.56, 0.54) |      |           |                     |
|                    | $\delta^{true}$ | 0.55         | 0.69         | 0.53         | 0.45         | 0.38         |      |           |                     |
| 9                  | % selected      | 17.4         | 63.3         | 17.3         | 1.7          | 0.1          | 0.2  | 20.4/10.7 | 37.3                |
|                    | # patients      | 12.81        | 19.57        | 11.21        | 3.23         | 1.09         |      |           |                     |
| 12                 | % selected      | 23.1         | 61.0         | 13.6         | 2.0          | 0.2          | 0.1  | 20.4/10.7 | 37.2                |
|                    | # patients      | 13.43        | 19.52        | 10.73        | 3.28         | 1.01         |      |           |                     |
|                    | Scenario 7      | (0.02, 0.10) | (0.05, 0.25) | (0.30, 0.30) | (0.40, 0.55) | (0.50, 0.70) |      |           |                     |
|                    | $\delta^{true}$ | 0.43         | 0.34         | 0.42         | 0.31         | 0.27         |      |           |                     |
| 9                  | % selected      | 0.0          | 4.4          | 61.3         | 8.6          | 1.5          | 24.2 | 11.1/15.4 | 33.5                |
|                    | # patients      | 5.76         | 9.26         | 17.26        | 6.19         | 5.75         |      |           |                     |
| 12                 | % selected      | 0.0          | 3.6          | 61.2         | 8.2          | 1.7          | 25.3 | 11.1/15.5 | 33.8                |
|                    | # patients      | 5.63         | 9.15         | 17.00        | 6.64         | 5.79         |      |           |                     |
|                    | Scenario 8      | (0.02, 0.10) | (0.05, 0.25) | (0.35, 0.55) | (0.40, 0.60) | (0.50, 0.70) |      |           |                     |
|                    | $\delta^{true}$ | 0.43         | 0.34         | 0.29         | 0.28         | 0.27         |      |           |                     |
| 9                  | % selected      | 0.0          | 2.0          | 12.8         | 0.7          | 0.4          | 84.1 | 8.2/14.6  | 25.4                |
|                    | # patients      | 5.91         | 9.81         | 13.41        | 4.15         | 2.28         |      |           |                     |
| 12                 | % selected      | 0.0          | 1.9          | 14.8         | 0.8          | 0.0          | 82.5 | 8.0/14.5  | 24.9                |
|                    | # patients      | 5.71         | 9.60         | 13.02        | 4.07         | 2.60         |      |           |                     |



Table S8: Sensitivity analysis of the LO-EffTox design under different values of the correlation parameter  $\phi$  in Case 1. The probability pairs given in parentheses for each dose level are  $(\pi_E(d_r)^{true}, \pi_T(d_r)^{true})$ .

| $\phi$ |                 | Dose Level   |              |              |              |              | None | $N_E/N_T$ | Duration<br>(Weeks) |
|--------|-----------------|--------------|--------------|--------------|--------------|--------------|------|-----------|---------------------|
|        |                 | 1            | 2            | 3            | 4            | 5            |      |           |                     |
|        | Scenario 1      | (0.05, 0.03) | (0.10, 0.05) | (0.20, 0.07) | (0.25, 0.08) | (0.35, 0.10) |      |           |                     |
|        | $\delta^{true}$ | 0.52         | 0.53         | 0.58         | 0.61         | 0.67         |      |           |                     |
| 0.1    | % selected      | 0.0          | 0.3          | 1.5          | 3.0          | 92.3         | 2.9  | 11.7/3.7  | 37.0                |
|        | # patients      | 6.06         | 6.58         | 6.85         | 5.06         | 23.02        |      |           |                     |
| 2.5    | % selected      | 0.0          | 0.5          | 2.3          | 3.8          | 90.8         | 2.6  | 11.6/3.7  | 37.0                |
|        | # patients      | 6.04         | 6.80         | 6.88         | 4.97         | 22.98        |      |           |                     |
|        | Scenario 2      | (0.02, 0.10) | (0.10, 0.15) | (0.40, 0.20) | (0.45, 0.30) | (0.50, 0.60) |      |           |                     |
|        | $\delta^{true}$ | 0.43         | 0.43         | 0.59         | 0.52         | 0.32         |      |           |                     |
| 0.1    | % selected      | 0.0          | 11.3         | 61.5         | 20.9         | 5.4          | 0.9  | 15.4/13.2 | 37.0                |
|        | # patients      | 27.11        | 13.15        | 5.41         | 1.73         | 0.45         |      |           |                     |
| 2.5    | % selected      | 0.0          | 11.2         | 63.6         | 19.2         | 5.3          | 0.7  | 15.5/13.1 | 37.3                |
|        | # patients      | 6.02         | 9.40         | 13.74        | 9.49         | 9.16         |      |           |                     |
|        | Scenario 3      | (0.30, 0.10) | (0.35, 0.20) | (0.45, 0.40) | (0.50, 0.60) | (0.55, 0.65) |      |           |                     |
|        | $\delta^{true}$ | 0.63         | 0.55         | 0.43         | 0.32         | 0.31         |      |           |                     |
| 0.1    | % selected      | 77.3         | 19.3         | 2.5          | 0.4          | 0.0          | 0.5  | 16.4/8.7  | 37.1                |
|        | # patients      | 26.86        | 13.74        | 4.96         | 1.78         | 0.45         |      |           |                     |
| 2.5    | % selected      | 77.3         | 21.1         | 1.3          | 0.2          | 0.0          | 0.1  | 16.6/8.9  | 37.3                |
|        | # patients      | 27.11        | 13.43        | 5.10         | 1.85         | 0.49         |      |           |                     |
|        | Scenario 4      | (0.18, 0.20) | (0.28, 0.24) | (0.55, 0.28) | (0.74, 0.31) | (0.79, 0.33) |      |           |                     |
|        | $\delta^{true}$ | 0.44         | 0.46         | 0.62         | 0.76         | 0.78         |      |           |                     |
| 0.1    | % selected      | 3.6          | 2.9          | 9.0          | 18.1         | 63.9         | 2.5  | 25.3/13.2 | 36.6                |
|        | # patients      | 9.94         | 7.10         | 7.83         | 9.61         | 12.65        |      |           |                     |
| 2.5    | % selected      | 2.9          | 3.7          | 7.7          | 18.6         | 65.0         | 2.1  | 25.4/13.1 | 36.7                |
|        | # patients      | 9.71         | 6.95         | 8.04         | 9.78         | 12.74        |      |           |                     |
|        | Scenario 5      | (0.20, 0.10) | (0.50, 0.19) | (0.52, 0.23) | (0.54, 0.44) | (0.56, 0.54) |      |           |                     |
|        | $\delta^{true}$ | 0.55         | 0.69         | 0.66         | 0.45         | 0.38         |      |           |                     |
| 0.1    | % selected      | 13.4         | 48.1         | 31.4         | 5.9          | 1.0          | 0.2  | 21.0/10.3 | 37.2                |
|        | # patients      | 11.37        | 16.48        | 13.85        | 4.69         | 1.52         |      |           |                     |
| 2.5    | % selected      | 14.2         | 47.4         | 31.8         | 6.0          | 0.4          | 0.2  | 21.0/10.2 | 37.3                |
|        | # patients      | 11.35        | 16.60        | 14.09        | 4.59         | 1.29         |      |           |                     |

| $\phi$ |                 | Dose Level   |              |              |              |              | None | $N_E/N_T$ | Duration<br>(Weeks) |
|--------|-----------------|--------------|--------------|--------------|--------------|--------------|------|-----------|---------------------|
|        |                 | 1            | 2            | 3            | 4            | 5            |      |           |                     |
|        | Scenario 6      | (0.20, 0.10) | (0.50, 0.19) | (0.52, 0.34) | (0.54, 0.44) | (0.56, 0.54) |      |           |                     |
|        | $\delta^{true}$ | 0.55         | 0.69         | 0.53         | 0.45         | 0.38         |      |           |                     |
| 0.1    | % selected      | 22.0         | 59.6         | 15.1         | 2.0          | 0.7          | 0.6  | 20.4/10.8 | 37.5                |
|        | # patients      | 13.19        | 19.44        | 10.79        | 3.38         | 0.98         |      |           |                     |
| 2.5    | % selected      | 20.4         | 60.6         | 16.2         | 2.2          | 0.2          | 0.4  | 20.3/10.7 | 37.1                |
|        | # patients      | 13.01        | 19.63        | 10.82        | 3.39         | 1.00         |      |           |                     |
|        | Scenario 7      | (0.02, 0.10) | (0.05, 0.25) | (0.30, 0.30) | (0.40, 0.55) | (0.50, 0.70) |      |           |                     |
|        | $\delta^{true}$ | 0.43         | 0.34         | 0.42         | 0.31         | 0.27         |      |           |                     |
| 0.1    | % selected      | 0.0          | 3.4          | 62.4         | 8.0          | 1.1          | 25.1 | 10.9/15.4 | 33.8                |
|        | # patients      | 6.24         | 8.89         | 16.91        | 6.42         | 5.88         |      |           |                     |
| 2.5    | % selected      | 0.0          | 4.1          | 61.0         | 8.5          | 0.8          | 25.6 | 11.1/15.4 | 33.5                |
|        | # patients      | 6.12         | 9.12         | 16.93        | 6.39         | 5.62         |      |           |                     |
|        | Scenario 8      | (0.02, 0.10) | (0.05, 0.25) | (0.35, 0.55) | (0.40, 0.60) | (0.50, 0.70) |      |           |                     |
|        | $\delta^{true}$ | 0.43         | 0.34         | 0.29         | 0.28         | 0.27         |      |           |                     |
| 0.1    | % selected      | 0.0          | 1.7          | 13.8         | 1.0          | 0.2          | 83.3 | 8.0/14.5  | 25.2                |
|        | # patients      | 6.13         | 10.10        | 13.01        | 4.18         | 2.33         |      |           |                     |
| 2.5    | % selected      | 0.0          | 2.0          | 17.0         | 0.5          | 0.0          | 80.5 | 8.0/14.5  | 25.1                |
|        | # patients      | 6.12         | 9.87         | 13.23        | 3.90         | 2.44         |      |           |                     |

Table S 9: Simulation results of the LO-EffTox design using a piecewise exponential model and the Weibull model (for imputing missing outcomes) in Case 1. The true time to events is generated based on a 6-piecewise exponential distribution with hazard  $(\lambda_1, \lambda_2, \lambda_3, \lambda_4, \lambda_5, \lambda_6) = (0.001, 0.001, 0.001, 0.001, 0.001, 4.0)$ .

| Dist.     |                 | Dose Level   |              |              |              |              | None | $N_E/N_T$ | Duration<br>(Weeks) |
|-----------|-----------------|--------------|--------------|--------------|--------------|--------------|------|-----------|---------------------|
|           |                 | 1            | 2            | 3            | 4            | 5            |      |           |                     |
|           | Scenario 1      | (0.05, 0.03) | (0.10, 0.05) | (0.20, 0.07) | (0.25, 0.08) | (0.35, 0.10) |      |           |                     |
|           | $\delta^{true}$ | 0.52         | 0.53         | 0.58         | 0.61         | 0.67         |      |           |                     |
| Piecewise | % selected      | 0.1          | 0.3          | 4.0          | 5.9          | 84.5         | 5.2  | 11.8/3.8  | 36.6                |
|           | # patients      | 5.64         | 6.42         | 6.62         | 5.39         | 23.11        |      |           |                     |
| Weibull   | % selected      | 0.0          | 0.5          | 3.1          | 4.9          | 77.7         | 13.8 | 12.1/3.9  | 34.3                |
|           | # patients      | 3.20         | 4.62         | 6.51         | 4.87         | 25.25        |      |           |                     |
|           | Scenario 2      | (0.02, 0.10) | (0.10, 0.15) | (0.40, 0.20) | (0.45, 0.30) | (0.50, 0.60) |      |           |                     |
|           | $\delta^{true}$ | 0.43         | 0.43         | 0.59         | 0.52         | 0.32         |      |           |                     |
| Piecewise | % selected      | 0.0          | 13.2         | 58.8         | 15.8         | 8.4          | 3.8  | 15.2/13.4 | 36.6                |
|           | # patients      | 6.10         | 9.35         | 13.35        | 7.87         | 10.44        |      |           |                     |
| Weibull   | % selected      | 0.1          | 19.3         | 57.2         | 12.3         | 4.2          | 6.9  | 15.7/13.5 | 35.2                |
|           | # patients      | 3.28         | 9.27         | 15.49        | 7.64         | 10.21        |      |           |                     |
|           | Scenario 3      | (0.30, 0.10) | (0.35, 0.20) | (0.45, 0.40) | (0.50, 0.60) | (0.55, 0.65) |      |           |                     |
|           | $\delta^{true}$ | 0.63         | 0.55         | 0.43         | 0.32         | 0.31         |      |           |                     |
| Piecewise | % selected      | 72.2         | 21.5         | 3.6          | 1.1          | 0.4          | 1.2  | 16.8/10.2 | 37.2                |
|           | # patients      | 24.36        | 12.86        | 6.24         | 2.97         | 1.31         |      |           |                     |
| Weibull   | % selected      | 68.1         | 23.3         | 5.2          | 0.6          | 0.2          | 2.6  | 17.3/11.4 | 36.6                |
|           | # patients      | 20.01        | 13.92        | 7.65         | 3.57         | 2.20         |      |           |                     |
|           | Scenario 4      | (0.18, 0.20) | (0.28, 0.24) | (0.55, 0.28) | (0.74, 0.31) | (0.79, 0.33) |      |           |                     |
|           | $\delta^{true}$ | 0.44         | 0.46         | 0.62         | 0.76         | 0.78         |      |           |                     |
| Piecewise | % selected      | 8.4          | 5.6          | 11.5         | 18.1         | 52.3         | 4.1  | 23.6/12.7 | 36.0                |
|           | # patients      | 11.40        | 8.11         | 7.56         | 8.02         | 11.60        |      |           |                     |
| Weibull   | % selected      | 6.2          | 4.9          | 8.7          | 20.3         | 55.9         | 4.0  | 26.7/13.3 | 36.1                |
|           | # patients      | 7.14         | 6.93         | 7.94         | 9.34         | 15.34        |      |           |                     |

| Dist.     |                 | Dose Level   |              |              |              |              | None | $N_E/N_T$ | Duration<br>(Weeks) |
|-----------|-----------------|--------------|--------------|--------------|--------------|--------------|------|-----------|---------------------|
|           |                 | 1            | 2            | 3            | 4            | 5            |      |           |                     |
|           | Scenario 5      | (0.20, 0.10) | (0.50, 0.19) | (0.52, 0.23) | (0.54, 0.44) | (0.56, 0.54) |      |           |                     |
|           | $\delta^{true}$ | 0.55         | 0.69         | 0.66         | 0.45         | 0.38         |      |           |                     |
| Piecewise | % selected      | 22.0         | 42.2         | 26.1         | 6.8          | 2.6          | 0.3  | 21.2/11.0 | 37.3                |
|           | # patients      | 11.91        | 14.54        | 12.15        | 6.59         | 2.71         |      |           |                     |
| Weibull   | % selected      | 22.7         | 45.5         | 24.1         | 5.6          | 1.6          | 0.5  | 21.8/11.8 | 37.2                |
|           | # patients      | 9.43         | 15.55        | 12.04        | 6.53         | 4.27         |      |           |                     |
|           | Scenario 6      | (0.20, 0.10) | (0.50, 0.19) | (0.52, 0.34) | (0.54, 0.44) | (0.56, 0.54) |      |           |                     |
|           | $\delta^{true}$ | 0.55         | 0.69         | 0.53         | 0.45         | 0.38         |      |           |                     |
| Piecewise | % selected      | 29.7         | 45.7         | 16.8         | 5.3          | 1.9          | 0.6  | 20.2/11.4 | 37.3                |
|           | # patients      | 13.97        | 16.01        | 10.79        | 5.04         | 2.00         |      |           |                     |
| Weibull   | % selected      | 28.6         | 46.9         | 16.1         | 5.1          | 1.8          | 1.5  | 21.1/12.3 | 37.0                |
|           | # patients      | 11.04        | 16.39        | 10.94        | 5.74         | 3.35         |      |           |                     |
|           | Scenario 7      | (0.02, 0.10) | (0.05, 0.25) | (0.30, 0.30) | (0.40, 0.55) | (0.50, 0.70) |      |           |                     |
|           | $\delta^{true}$ | 0.43         | 0.34         | 0.42         | 0.31         | 0.27         |      |           |                     |
| Piecewise | % selected      | 0.0          | 3.2          | 55.4         | 7.9          | 2.3          | 31.2 | 10.8/15.1 | 32.6                |
|           | # patients      | 5.94         | 8.81         | 15.59        | 6.09         | 6.54         |      |           |                     |
| Weibull   | % selected      | 0.0          | 5.6          | 53.3         | 4.9          | 0.8          | 35.4 | 11.2/15.0 | 30.6                |
|           | # patients      | 3.32         | 7.80         | 17.07        | 6.15         | 6.15         |      |           |                     |
|           | Scenario 8      | (0.02, 0.10) | (0.05, 0.25) | (0.35, 0.55) | (0.40, 0.60) | (0.50, 0.70) |      |           |                     |
|           | $\delta^{true}$ | 0.43         | 0.34         | 0.29         | 0.28         | 0.27         |      |           |                     |
| Piecewise | % selected      | 0.0          | 3.5          | 16.6         | 0.4          | 0.1          | 79.4 | 7.9/14.3  | 24.9                |
|           | # patients      | 5.98         | 9.32         | 12.93        | 3.96         | 2.74         |      |           |                     |
| Weibull   | % selected      | 0.0          | 4.7          | 15.4         | 0.2          | 0.1          | 79.6 | 8.4/14.2  | 23.0                |
|           | # patients      | 3.38         | 8.69         | 12.84        | 4.42         | 2.94         |      |           |                     |
